# Supplementary material
Source: publisher figshare collection journal article supplement (https://scielo.figshare.com/articles/dataset/_/10073654)
Supplement: Supplementary file 1 [file Table_1.xls]

## Sheet: Table_1
<b>Mortality</b>	<b>Mortality (%) 45 weeks of age</b>	<b>P value</b>	<b>Mortality (%) 70 weeks of age</b>	<b>P-value</b>
Early normal	12.5	1.00	12.5	0.71
Early glass-shelled	15		15
Intermediate normal	15		5
Intermediate glass-	7.5	0.72	7.5	1.00
shelled
Late normal	5	1.00	15	0.48
Late glass-shelled	10		7.5
Contaminated normal	2.5	0.28	0
Contaminated	5.0		10<a href="#TFN1">*</a>	0.02
glass-shelled
