# Supplementary material
Source: publisher figshare collection journal article supplement (https://scielo.figshare.com/articles/dataset/_/10073654)
Supplement: Supplementary file 2 [file Table_2.xls]

## Sheet: Table_2
<b></b>	<b>Normal 45 Weeks (%)</b>	<b>Glass-shelled 45 weeks (%)</b>	<b>Normal 70 weeks (%)</b>	<b>Glass-shelled 70 weeks (%)</b>
Navel with drawstring	5	10	5	7.5
Navel with residue	35	30	25	12.5
Normal navel	15	12.5	0	5
Black or poorly healed navel	10	12.5	12.5	15
Yolk out of the cavity	0	2.5	0	0
