# Supplementary material
Source: publisher figshare collection journal article supplement (https://scielo.figshare.com/articles/dataset/_/10073654)
Supplement: Supplementary file 3 [file Table_3.xls]

## Sheet: Table_3
<b></b>	<b>Normal</b>	<b>Glass-shelled</b>	<b>P</b>
45 weeks	87.5	74.07	0.294
70 weeks	88.24	92.3	1.000
